# Supplementary material for: Alignment of charge-transfer complexes for molecular devices
Source: Royal Society of Chemistry journal article supplement (doi:10.1039/b913172h), 2009-11-13
Supplement: b913172h.pdf [file b913172h.pdf]

**Supporting information**

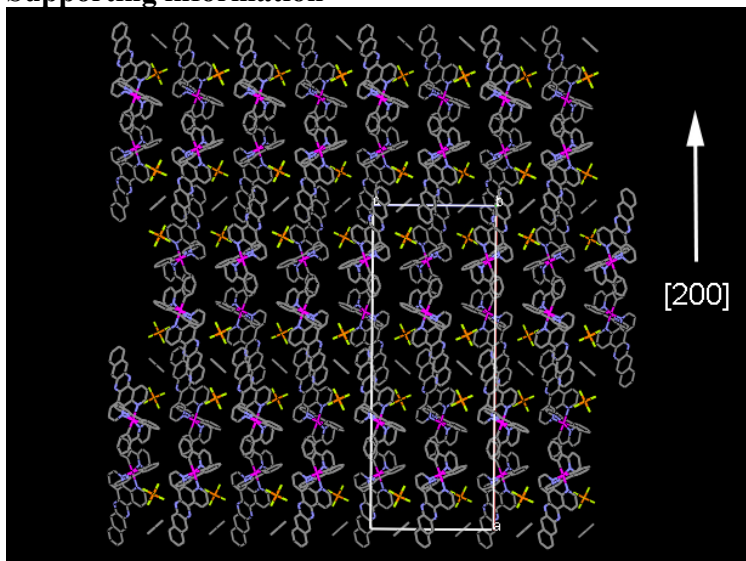

Crystal packing for complex 3 determined by single crystal X-ray diffraction.

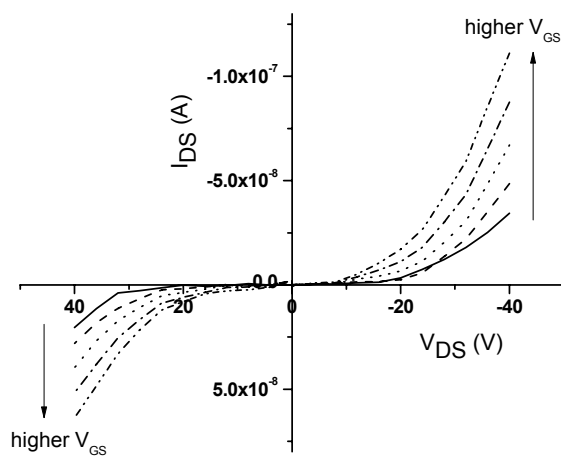

Output characteristics ( $I_{DS}$  versus  $V_{DS}$  at different  $V_{GS}$ ) for the electrostatically aligned films of complex 1, whereas the gate voltage was increased in steps of 10 V.

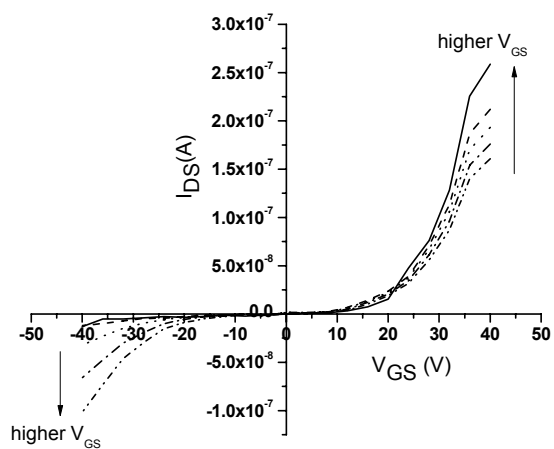

Output characteristics ( $I_{DS}$  versus  $V_{GS}$  at different  $V_{DS}$ ) for the electrostatically aligned films of complex **2**, whereas the gate voltage was increased in steps of 10 V.

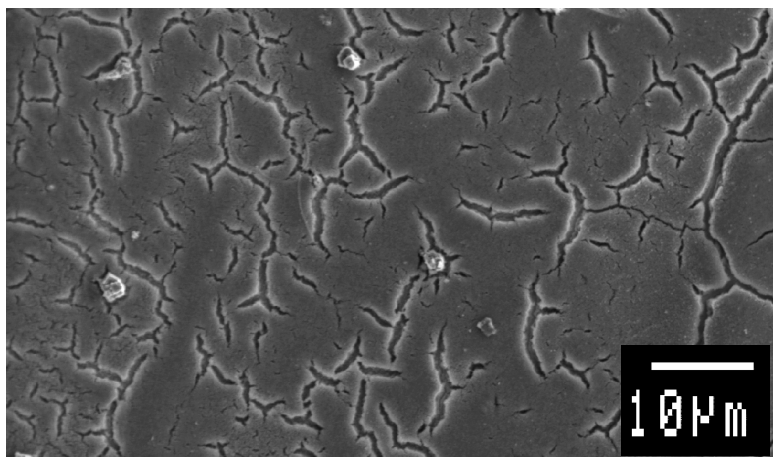

SEM image for the film of electrostatically aligned films of complex **2**.

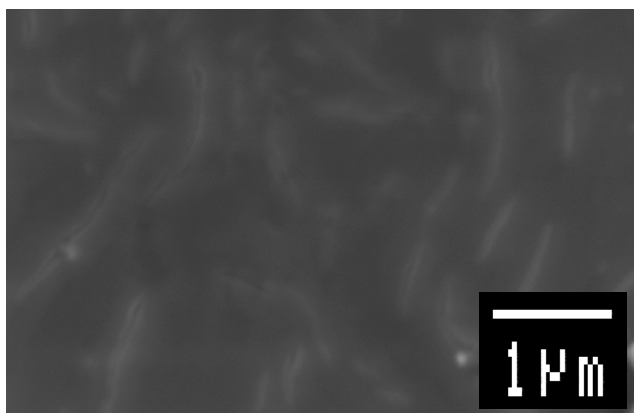

SEM image for the film of electrostatically aligned films of complex **1**.

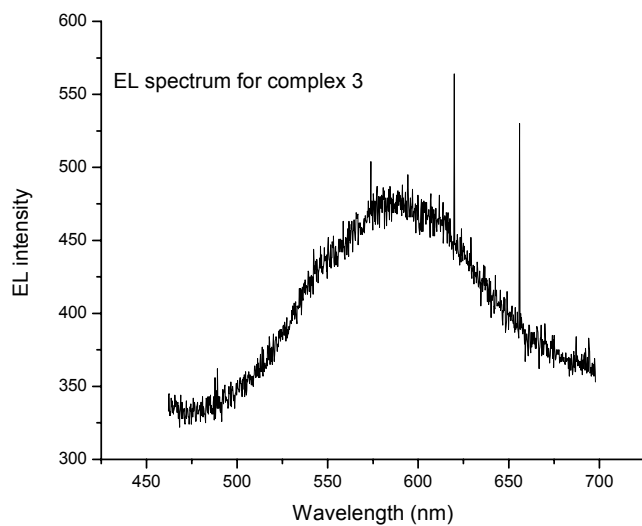

The EL spectrum for the device with complex **3**.
